# Supplementary material
Source: MDPI journal article supplement (https://www.mdpi.com/1996-1073/13/9/2236)
Supplement: s1 [file s1]

# The Role of Biorefinery Co-Products, Market Proximity and Feedstock Environmental Footprint in Meeting Biofuel Policy Goals for Winter Barley-to-Ethanol

Sabrina Spatari <sup>1,2,\*</sup>, Alexander Staedel <sup>1</sup>, Paul R. Adler <sup>3</sup>, Saurajyoti Kar <sup>1</sup>, William J. Parton <sup>4</sup>, Kevin B. Hicks <sup>5</sup>, Andrew J. McAloon <sup>5</sup> and Patrick L. Gurian <sup>1</sup>

This supporting information file contains 5 tables and 3 figures.

**Table S1.** Fossil Energy Input in Cumulative Energy Demand (CED) for Winter barley-to-ethanol Scenarios (MJ/MJ).

| Life cycle input                    | WBE1        | WBE2        | WBE3        | WBE4        |
|-------------------------------------|-------------|-------------|-------------|-------------|
| <b><u>Feedstock Production:</u></b> |             |             |             |             |
| Fertilizer (N)                      | 0.15        | 0.15        | 0.15        | 0.15        |
| Traction                            | 0.03        | 0.03        | 0.03        | 0.03        |
| Fertilizer (P)                      | 0.03        | 0.03        | 0.03        | 0.03        |
| Transport                           | 0.04        | 0.04        | 0.04        | 0.04        |
| Fertilizer (K2O)                    | 0.01        | 0.01        | 0.01        | 0.01        |
| Lime                                | 0.00        | 0.00        | 0.00        | 0.00        |
| <i>Total (Feedstock)</i>            | <i>0.26</i> | <i>0.26</i> | <i>0.26</i> | <i>0.26</i> |
| <b><u>Biorefinery:</u></b>          |             |             |             |             |
| Natural Gas                         | 0.65        | 0.65        | 0.65        | 0.65        |
| Electricity                         | 0.18        | 0.14        | 0.14        | 0.14        |
| Process                             | 0.00        | 0.00        | 0.00        | 0.00        |
| Chemicals, nutrients, enzymes       | 0.08        | 0.08        | 0.08        | 0.08        |
| Transport (co-products)             | 0.02        | 0.02        | 0.02        | 0.02        |
| CO <sub>2</sub> , Liquid, Avoided   | -0.21       |             |             |             |
| Co-product credits:                 |             |             |             |             |
| Soy Meal, Avoided                   | -0.09       | -0.09       | -0.09       |             |
| On Site Steam, Avoided              | -0.09       | -0.09       |             |             |
| Heat, Coal, Avoided                 | -0.24       | -0.24       |             |             |
| <i>Total (Biorefinery)</i>          | <i>0.29</i> | <i>0.45</i> | <i>0.79</i> | <i>0.88</i> |
| Fuel Transport and Distribution     | 0.002       | 0.002       | 0.002       | 0.002       |
| <b>CED (Fossil Energy)</b>          | <b>0.55</b> | <b>0.71</b> | <b>1.05</b> | <b>1.14</b> |

**Table S2.** Projected Changes in Barley Production in the United States (Millions of Bushels)<sup>1</sup>

|                 | Control Case | Barley Case | Difference | Increase in production (%) and portion used for biofuel (%) |
|-----------------|--------------|-------------|------------|-------------------------------------------------------------|
| All barley      | 17512        | 20594       | 3082       |                                                             |
| Used in biofuel | 0            | 3108        | 3108       |                                                             |
| Winter          | 1236         | 1389        | 153        | 5 (production)                                              |
| Used in biofuel | 0            | 1328        | 1328       | 43 (biofuel use)                                            |
| Spring          | 16277        | 19205       | 2928       | 95 (production)                                             |
| Used in biofuel | 0            | 1780        | 1780       | 57 (biofuel use)                                            |

<sup>1</sup> Data taken from U.S. EPA [1], Table II.B.1-4.**Table S3.** Projected Changes in Barley Uses in the United States U.S. EPA's Barley Biofuel Scenario<sup>1</sup>

|                          | Control Case | Barley Case | Difference |
|--------------------------|--------------|-------------|------------|
| Production               | 17512        | 20594       | 3082       |
| Used in biofuel          | 0            | 3108        | 3108       |
| Used in feed             | 4151         | 4150        | -1         |
| Used in feed and malting | 13796        | 13786       | -10        |
| Net exports              | -435         | -453        | -18        |

<sup>1</sup> Data taken from U.S. EPA [1], Table II.B.1-4.**Table S4.** Projected Change in Barley Production (million bushels) by State<sup>1</sup>

|                       | Control Case | Barley Case | Difference |
|-----------------------|--------------|-------------|------------|
| Oregon                | 30           | 59          | 29         |
| Wyoming               | 12           | 24          | 12         |
| Montana               | 78           | 89          | 11         |
| Virginia              | 6            | 9           | 3          |
| California            | 15           | 17          | 2          |
| Rest of United States | 177          | 178         | 0          |
| Total                 | 319          | 375         | 56         |

<sup>1</sup> Data taken from U.S. EPA [1], Table II.B.1-5. Data were converted from million lb to million bushels assuming 48 lb per bu to align with Tables S1 and S2.

**Table S5.** Normal distribution parameters for N<sub>2</sub>O emissions, SOC change and life cycle GHGs for WBE1, WBE2, WBE3 and WBE4.

| Data and Scenarios                                      | mean ± stdev. |
|---------------------------------------------------------|---------------|
| N <sub>2</sub> O (gCO <sub>2</sub> e MJ <sup>-1</sup> ) | 2.30 ± 2.04   |
| SOC (gCO <sub>2</sub> e MJ <sup>-1</sup> )              | -17.73 ± 5.03 |
| WBE1 (gCO <sub>2</sub> e MJ <sup>-1</sup> )             | -6.34 ± 5.44  |
| WBE2 (gCO <sub>2</sub> e MJ <sup>-1</sup> )             | 28.29 ± 5.44  |
| WBE3 (gCO <sub>2</sub> e MJ <sup>-1</sup> )             | 45.58 ± 5.44  |
| WBE4 (gCO <sub>2</sub> e MJ <sup>-1</sup> )             | 51.48 ± 5.44  |
| <u>EPA Scenarios:</u>                                   |               |
| Barley ILUC (gCO <sub>2</sub> e MJ <sup>-1</sup> )      | 24.6          |
| Barley EPA (gCO <sub>2</sub> e MJ <sup>-1</sup> )       | 49.39±5.04    |
| WBE1 +EPA ILUC                                          | 18.26± 5.44   |
| Sorghum ILUC (gCO <sub>2</sub> e MJ <sup>-1</sup> )     | 28.4          |
| Sorghum EPA (gCO <sub>2</sub> e MJ <sup>-1</sup> )      | 44.6±4.47     |

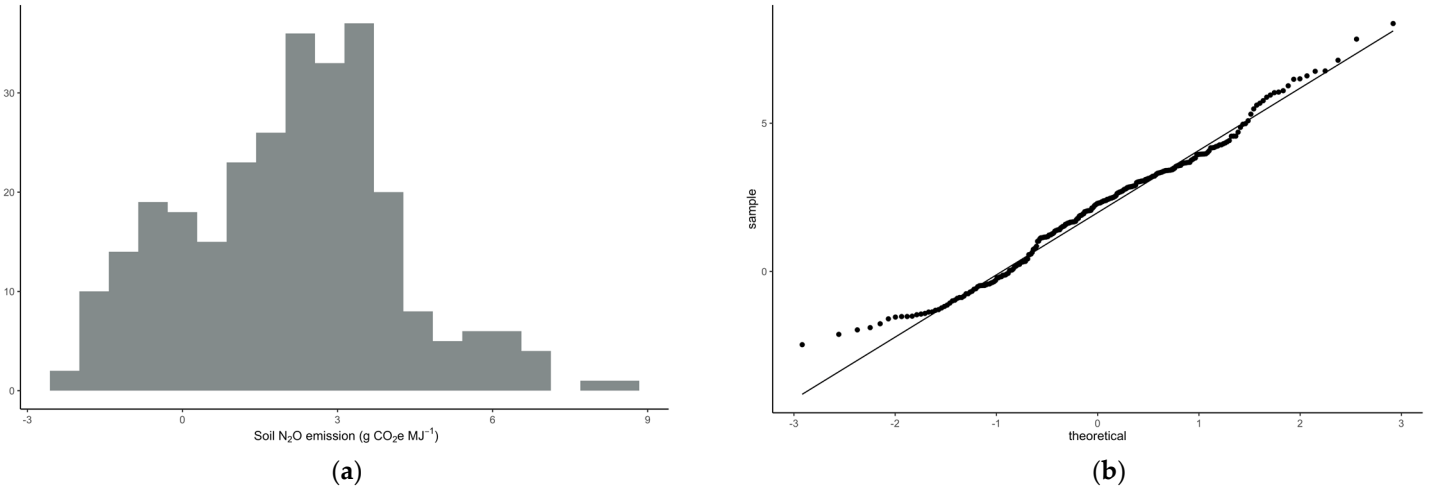

**Figure S1.** A (a) histogram and a (b) Q-Q plot of spatially varying soil N<sub>2</sub>O emissions (gCO<sub>2</sub>e MJ<sup>-1</sup>) for the studied counties. Total 284 counties are identified with cropland available for growing winter barley. Visual study of the plots suggest we assume data to be normally distributed.

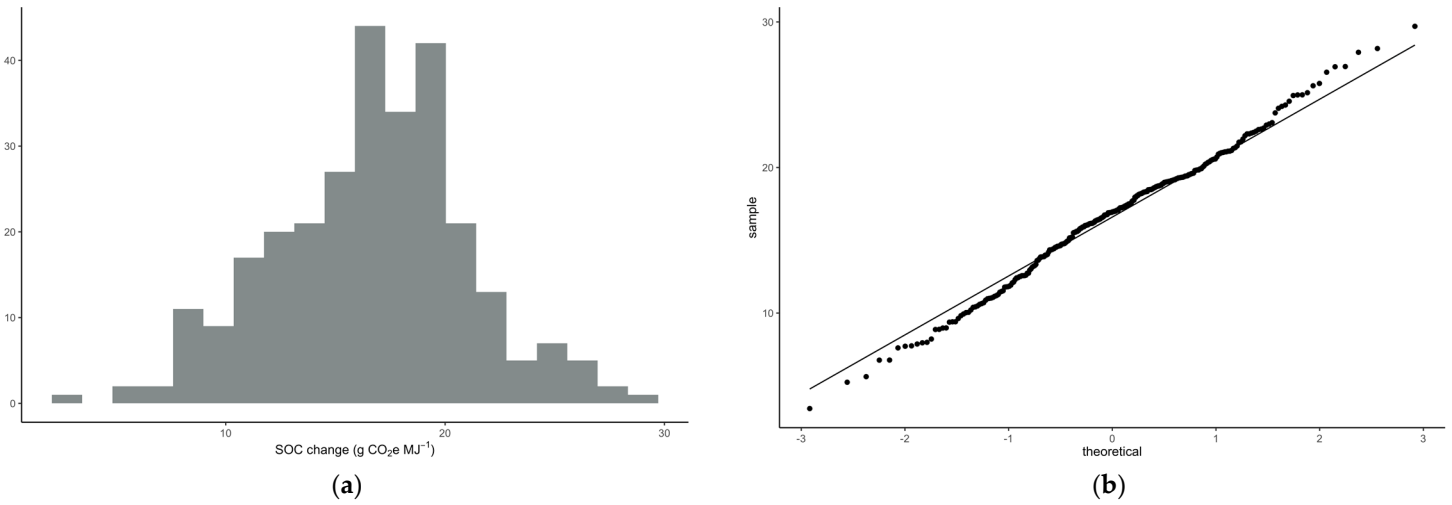

**Figure S2.** A (a) histogram and a (b) Q-Q plot of spatially changing soil SOC (gCO<sub>2</sub>e MJ<sup>-1</sup>) for the studied counties. The positive value represents net soil carbon increase from WB. A total

284 counties are identified with cropland available for growing winter barley. Visual study of the plots suggest we assume data to be normally distributed.

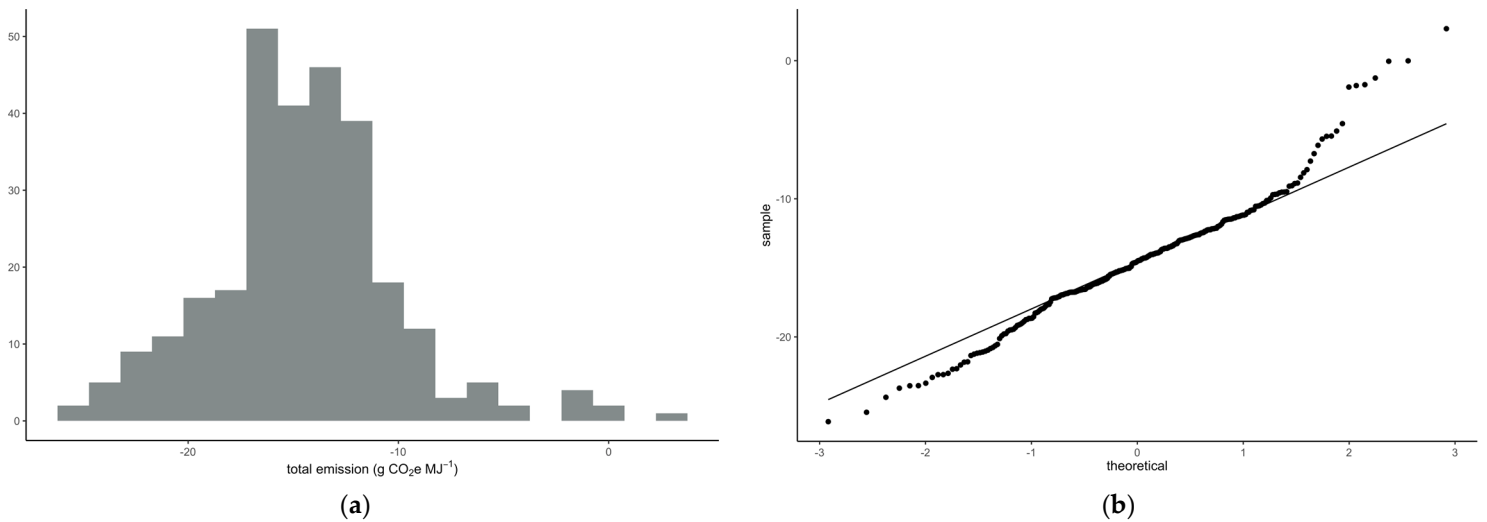

**Figure S3.** A (a) histogram and a (b) Q-Q plot of spatially varying total (N<sub>2</sub>O + SOC) emissions (gCO<sub>2</sub>e MJ<sup>-1</sup>) for the studied counties. Visual study of the plots suggest we assume data to be normally distributed. Negative gCO<sub>2</sub>e MJ<sup>-1</sup> represents carbon sequestration to soil. A total 284 counties are identified with cropland available for growing winter barley.

## References

1. EPA, U. *Notice of Data Availability Concerning Renewable Fuels Produced from Barley under the RFS Program*; EPA-HQ-OAR-2013-0178; U.S. Environmental Protection Agency: July 23, 2013, 2013; pp 44075–44089.
